# Supplementary material
Source: PubMed Central journal article supplement (PMC2832818)

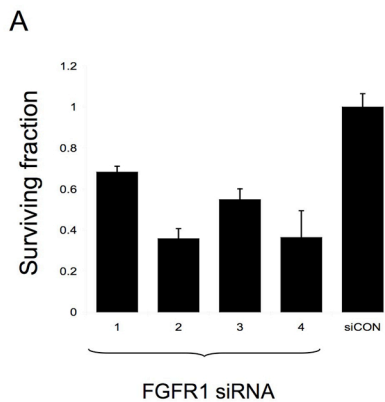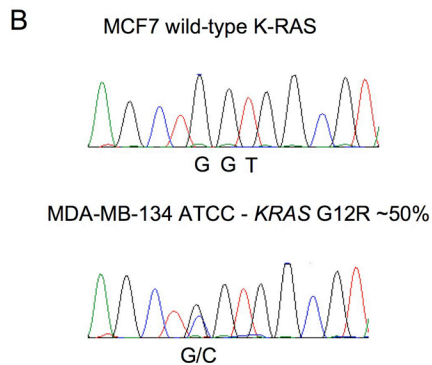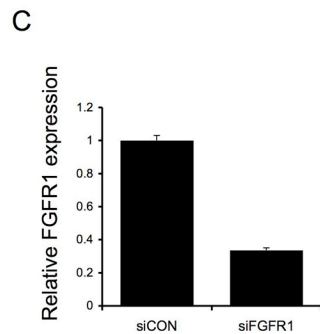

# Turner et al Supplementary Figure 2

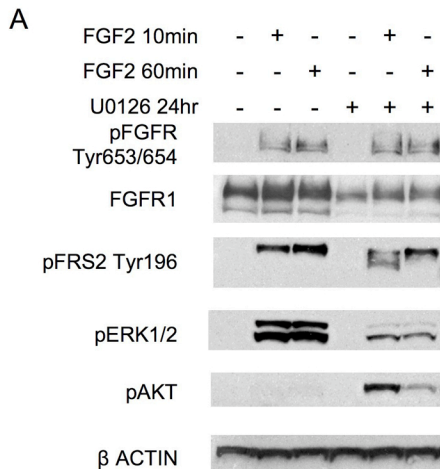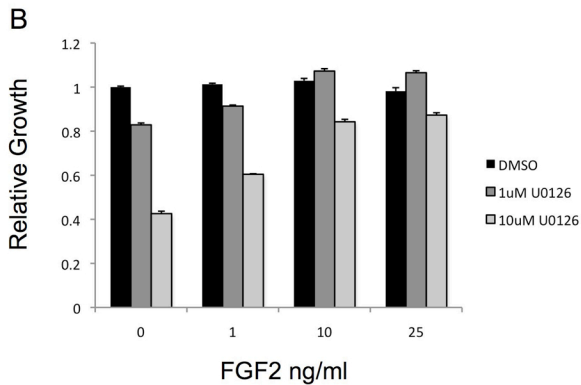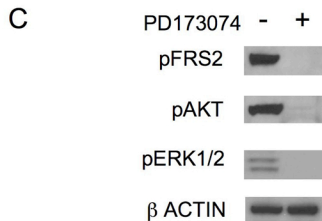

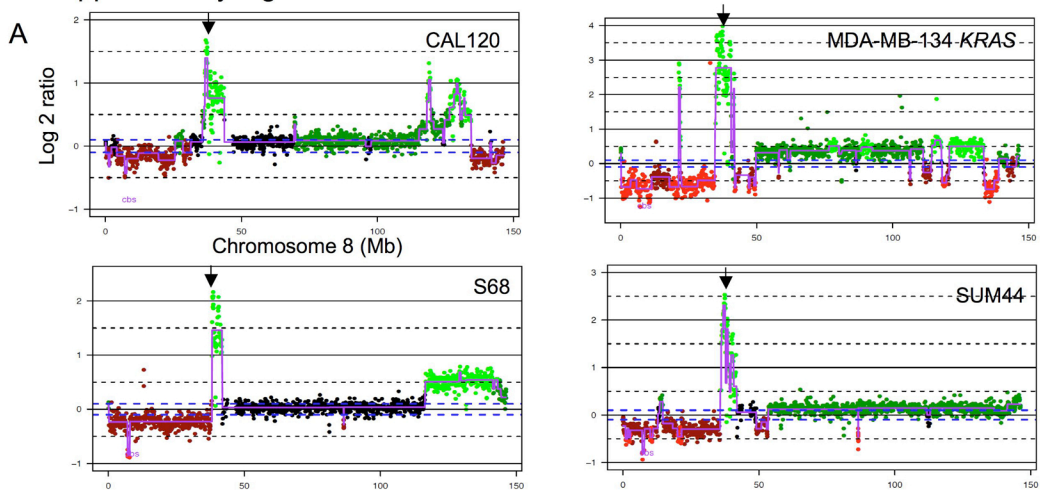

**B**

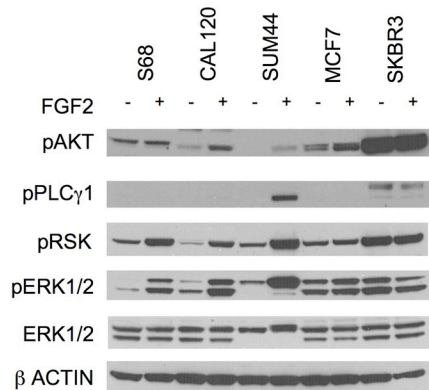

A

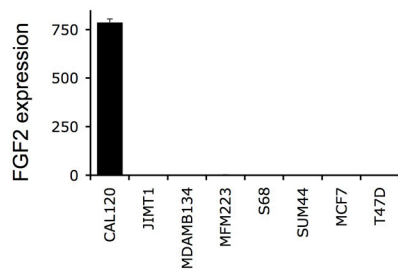

B

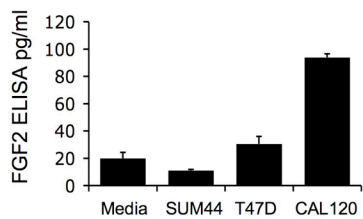

A

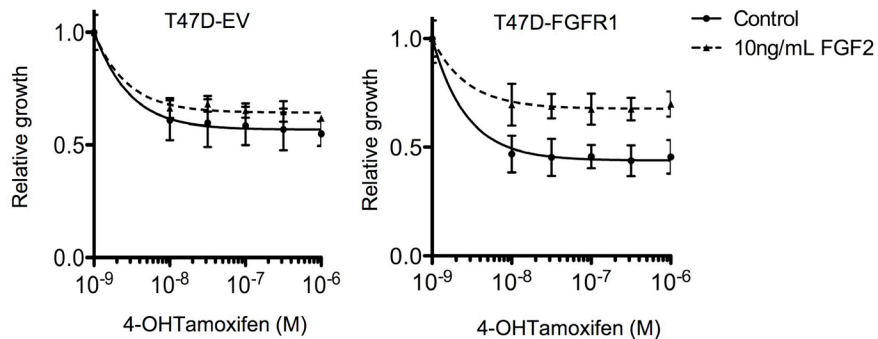

B

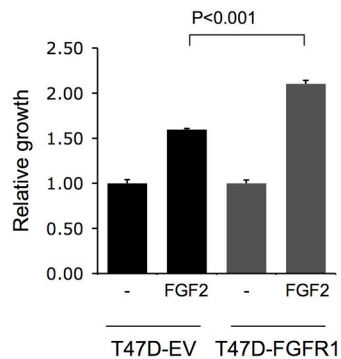

Gene expression

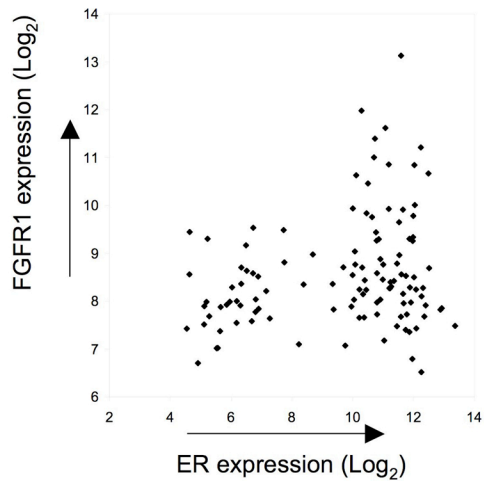

Copy number

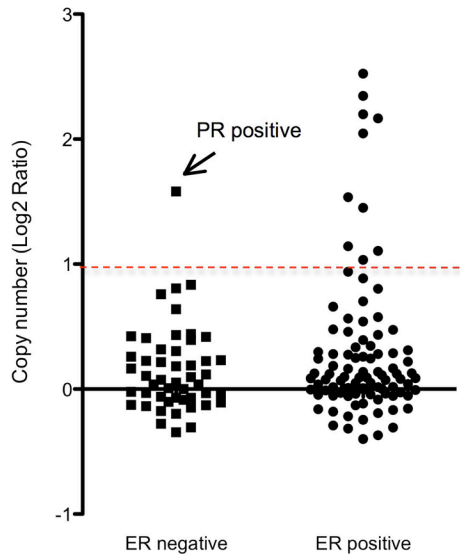

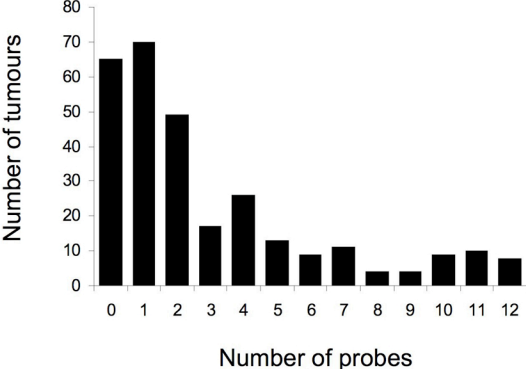

Supplement: NIHMS28311-supplement-2.pdf [file NIHMS28311-supplement-2.pdf]
